# Supplementary material for: Intragranular cracking as a critical barrier for high-voltage usage of layer-structured cathode for lithium-ion batteries
Source: PubMed Central journal article supplement (PMC5241805; doi:10.1038/ncomms14101), 2017-01-16
Supplement: ncomms14101-s1.pdf [file ncomms14101-s1.pdf]

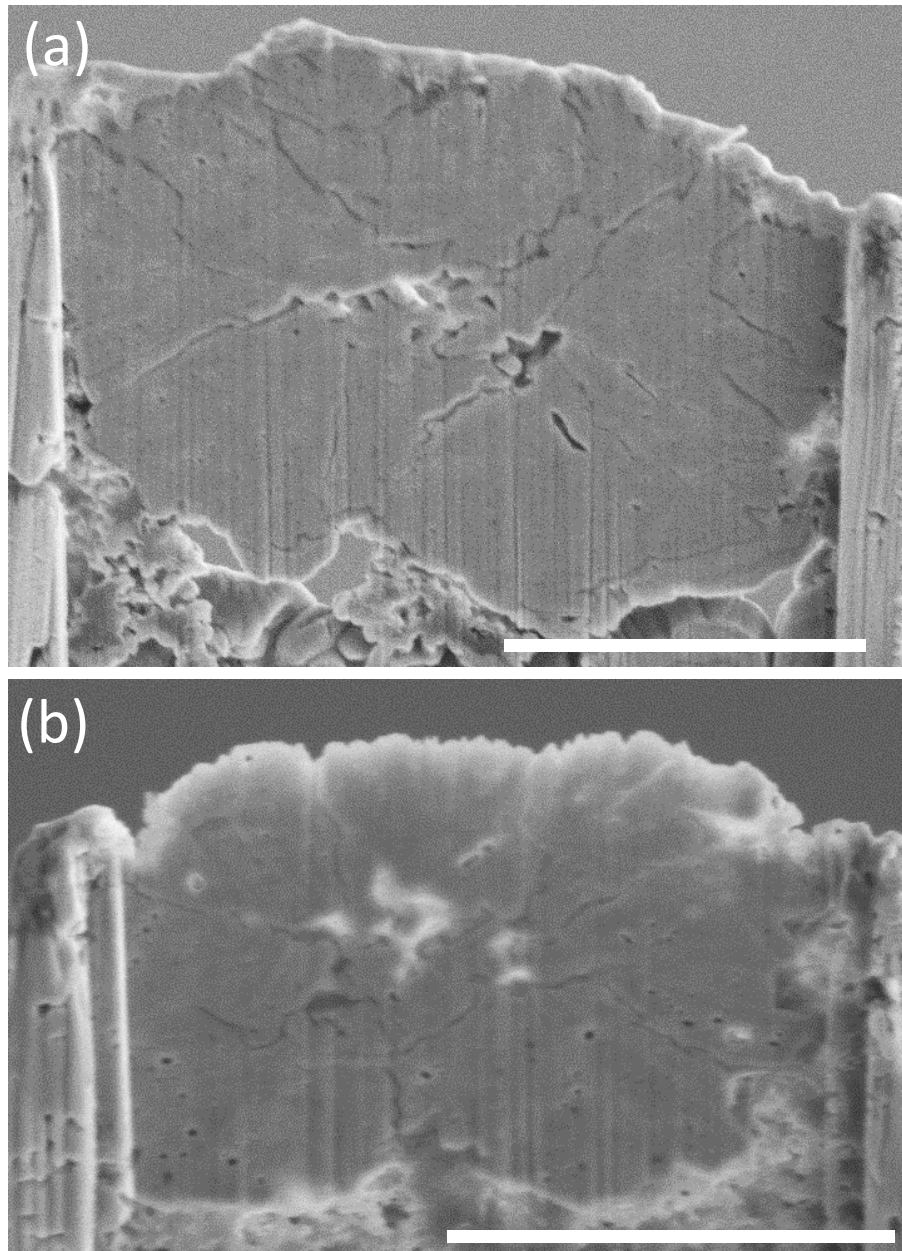

**Supplementary Figure 1. Cross sectional scanning electron microscopy (SEM) images.** SEM images reveal the Intergranular cracks formation in the  $\text{LiNi}_{1/3}\text{Mn}_{1/3}\text{Co}_{1/3}\text{O}_2$  (NMC333) secondary particles following the battery cycling at different voltages. (a) after 100 cycles with the high cut-off voltage of 4.2 V and (b) after 100 cycles with the high cut-off voltage of 4.5 V. The scale bars are 5  $\mu\text{m}$ .

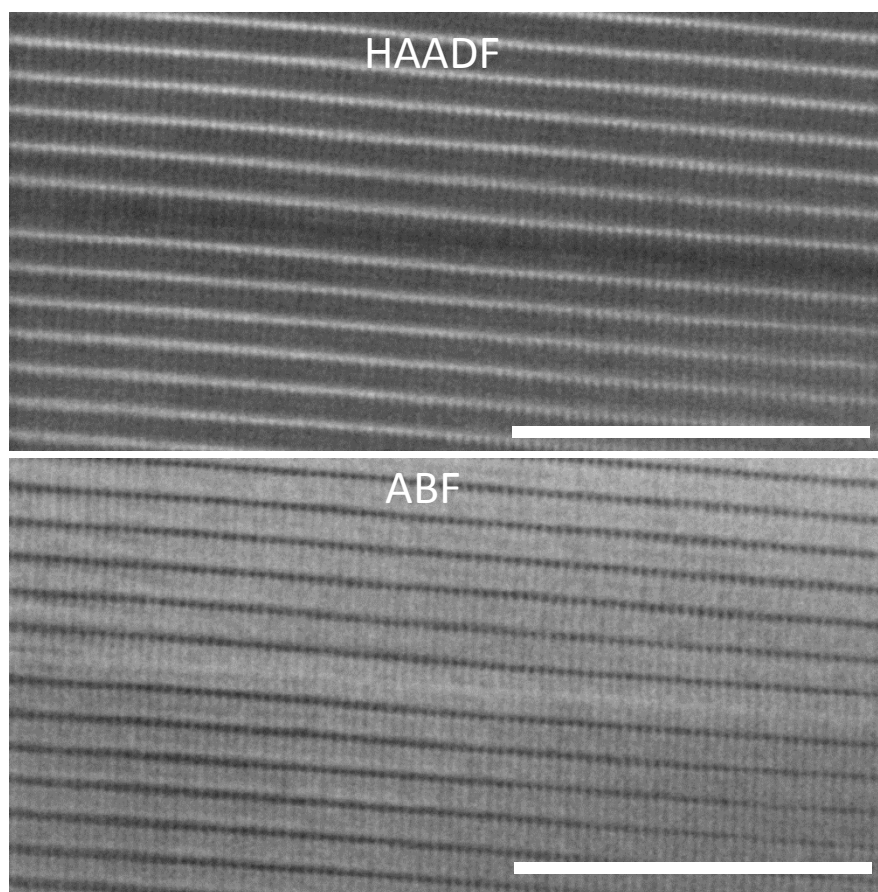

**Supplementary Figure 2. Imaging a premature crack.** High angle annular dark field/annular bright field (HAADF/ABF) images of a premature crack along the [1-10] zone axis in a  $\text{LiNi}_{1/3}\text{Mn}_{1/3}\text{Co}_{1/3}\text{O}_2$  (NMC333) particle following 100 cycles with the high cut-off voltage of 4.5 V. The contrast within the strip in the ABF image indicates the strip is not empty. The scale bars are 5 nm.

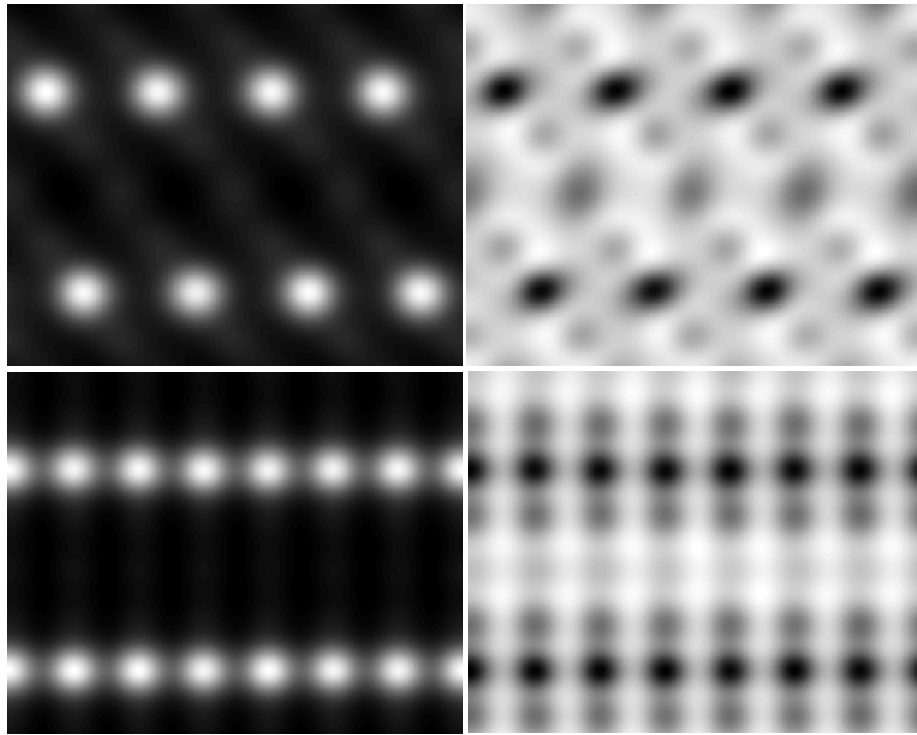

**Supplementary Figure 3. Image simulation.** Simulated high angle annular dark field/annular bright field (HAADF/ABF) images from [010] zone axis (top row) and [1-10] zone axis (bottom row). The sample thickness is 50 nm.

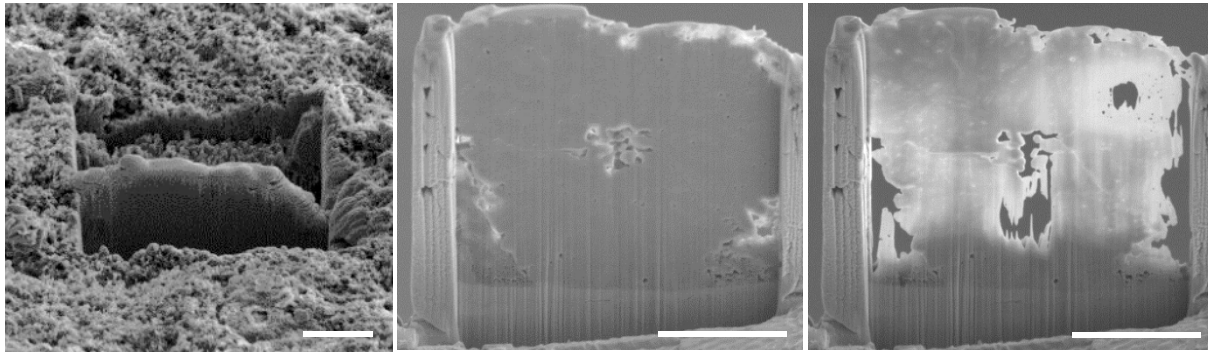

**Supplementary Figure 4. Specimen preparation.** Scanning electron microscopy images to show the lift-out process in preparation of a transmission electron microscopy (TEM) specimen by using focused ion beam (FIB). The scale bars are 4 nm.
